# Supplementary material for: Metformin suppresses adipogenesis through both AMP-activated protein kinase (AMPK)-dependent and AMPK-independent mechanisms
Source: PubMed Central journal article supplement (PMC5228588; doi:10.1016/j.mce.2016.11.011), 2017-01-15

## Supplementary Figure 1

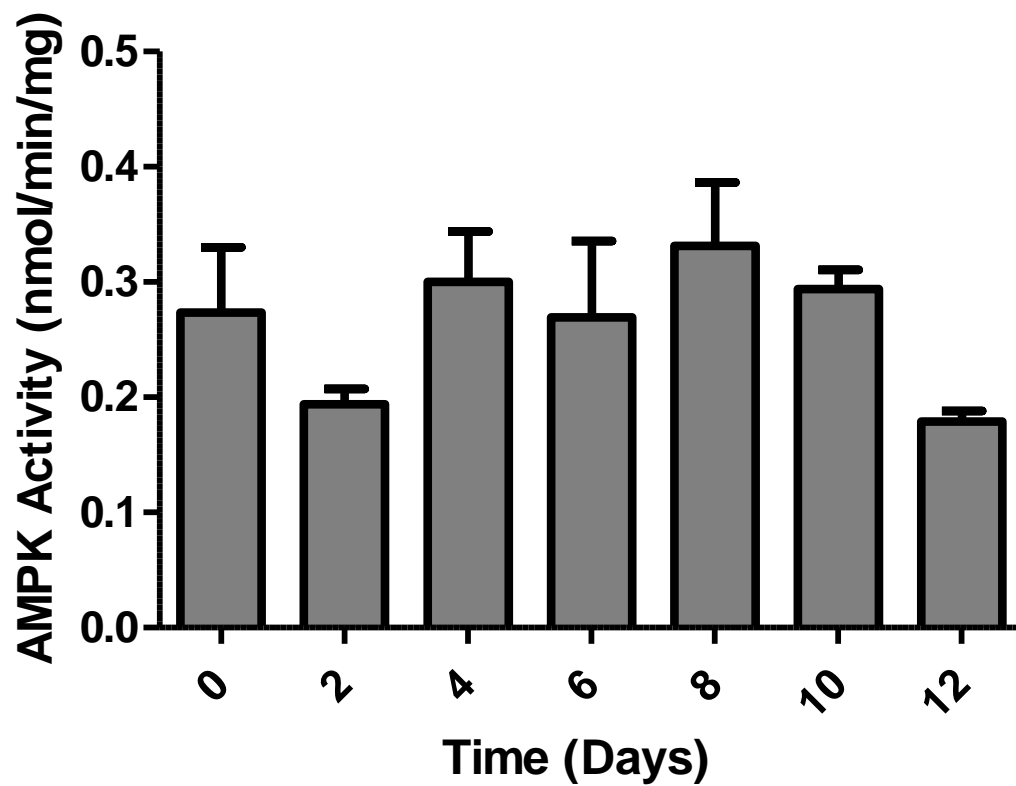

Supplement: mmc1.pdf [file mmc1.pdf]
